# Supplementary material for: Activation of PPARβ/δ Causes a Psoriasis-Like Skin Disease In Vivo
Source: PubMed Central journal article supplement (PMC2838790; doi:10.1371/journal.pone.0009701), 2010-03-16
Supplement: pone.0009701.s008.pdf [file pone.0009701.s008.pdf]

| Gene Symbol | GAIN |        | GSE14905 |       | PPAR b/d TG mice |       |
|-------------|------|--------|----------|-------|------------------|-------|
|             | FC   | p      | FC       | p     | FC               | p     |
| PTK6        | 1.3  | 6.E-07 | 1.8      | 5E-06 | 5.7              | 0.000 |
| STYK1       | 1.6  | 1.E-06 | 2.2      | 7E-05 | 3.0              | 0.010 |
| MAPK13      | 1.9  | 2.E-18 | 2.6      | 7E-08 | 2.9              | 0.001 |
| UCK2        | 2.2  | 5.E-21 | 2.4      | 2E-06 | 2.9              | 0.002 |
| RPS6KB2     | 1.8  | 9.E-15 | 2.3      | 2E-08 | 2.8              | 0.002 |
| PLK3        | 1.1  | 3.E-01 | 1.5      | 5E-04 | 2.6              | 0.020 |
| NEK2        | 2.5  | 6.E-15 | 2.5      | 2E-03 | 2.6              | 0.005 |
| TK1         | 2.6  | 3.E-15 | 5.4      | 8E-07 | 2.6              | 0.013 |
| MAPK6       | 1.7  | 3.E-21 | 2.1      | 6E-09 | 2.4              | 0.002 |
| BMP2K       | 1.6  | 4.E-08 | 1.9      | 3E-09 | 2.4              | 0.019 |
| MAP3K8      | 1.5  | 4.E-05 | 1.8      | 5E-05 | 2.3              | 0.001 |
| IPPK        | 1.6  | 3.E-17 | 1.8      | 1E-06 | 2.2              | 0.002 |
| PFKFB4      | 1.3  | 5.E-05 | 1.4      | 4E-03 | 2.1              | 0.033 |
| RPS6KA4     | 1.4  | 2.E-08 | 2.1      | 2E-06 | 2.0              | 0.003 |
| SRPK1       | 1.3  | 4.E-06 | 1.5      | 4E-05 | 2.0              | 0.010 |
| IRAK3       | 1.3  | 9.E-07 | 1.6      | 9E-04 | 1.9              | 0.015 |
| PRKCH       | 1.5  | 8.E-16 | 1.8      | 7E-07 | 1.9              | 0.019 |
| AURKA       | 3.4  | 9.E-17 | 5.1      | 3E-07 | 1.9              | 0.045 |
| CDKN1A      | 1.6  | 4.E-08 | 1.7      | 2E-04 | 1.8              | 0.015 |
| MAP3K9      | 2.1  | 2.E-11 | 2.3      | 2E-05 | 1.8              | 0.023 |
| MARK1       | 1.3  | 8.E-04 | 1.8      | 2E-04 | 1.7              | 0.025 |
| MAP2K4      | 1.5  | 1.E-07 | 1.6      | 1E-05 | 1.7              | 0.005 |
| CKS1B       | 1.2  | 3.E-08 | 1.3      | 4E-03 | 1.7              | 0.019 |
| PIK3C2A     | 0.6  | 3.E-08 | 0.8      | 6E-03 | 1.6              | 0.001 |
| LIMK2       | 1.3  | 3.E-07 | 1.3      | 4E-05 | 1.6              | 0.002 |
| CSNK2B      | 1.1  | 1.E-01 | 1.4      | 7E-03 | 1.6              | 0.031 |
| AK2         | 1.6  | 6.E-19 | 1.8      | 1E-05 | 1.6              | 0.001 |
| MVK         | 1.2  | 8.E-02 | 1.9      | 3E-04 | 1.5              | 0.014 |
| CSNK1E      | 1.3  | 2.E-04 | 1.6      | 9E-04 | 1.5              | 0.014 |
| CSNK1A1     | 1.5  | 2.E-22 | 1.7      | 8E-09 | 1.5              | 0.005 |
| MAST4       | 1.2  | 1.E-03 | 1.4      | 5E-03 | 1.5              | 0.016 |
| RIPK4       | 1.4  | 1.E-12 | 1.5      | 4E-06 | 1.4              | 0.018 |
| MOBKL1A     | 0.8  | 9.E-03 | 0.6      | 7E-08 | 1.4              | 0.003 |
| MOBKL3      | 1.5  | 3.E-17 | 1.9      | 2E-09 | 1.4              | 0.001 |
| CDK7        | 1.3  | 3.E-06 | 1.4      | 8E-07 | 1.3              | 0.006 |
| MAP3K7      | 1.0  | 6.E-02 | 0.8      | 4E-04 | 1.3              | 0.015 |
| STRAP       | 1.2  | 6.E-07 | 1.3      | 3E-07 | 1.3              | 0.017 |
| HIPK1       | 0.9  | 1.E-04 | 0.7      | 8E-06 | 1.3              | 0.001 |
| CSNK1D      | 0.8  | 8.E-07 | 0.8      | 1E-06 | 1.3              | 0.015 |
| CLK1        | 1.1  | 8.E-01 | 0.8      | 3E-04 | 1.2              | 0.033 |
| RIOK2       | 1.2  | 1.E-03 | 1.4      | 2E-03 | 1.2              | 0.006 |
| CDK6        | 0.8  | 3.E-04 | 0.7      | 1E-05 | 1.2              | 0.034 |
| SLK         | 1.2  | 2.E-02 | 1.2      | 3E-03 | 1.2              | 0.000 |
| NUCKS1      | 0.8  | 4.E-10 | 0.7      | 3E-06 | 1.1              | 0.036 |
| AKAP13      | 0.7  | 5.E-09 | 0.7      | 8E-08 | 0.8              | 0.030 |
| MOBKL1B     | 1.7  | 3.E-16 | 1.9      | 1E-08 | 0.8              | 0.002 |
| PTK2B       | 1.0  | 1.E-01 | 0.7      | 4E-03 | 0.8              | 0.018 |
| CAMK2D      | 0.7  | 1.E-08 | 0.8      | 3E-03 | 0.8              | 0.047 |
| IRAK1       | 1.5  | 3.E-18 | 1.8      | 2E-10 | 0.8              | 0.002 |
| ADK         | 1.3  | 3.E-09 | 1.5      | 1E-04 | 0.7              | 0.007 |
| VRK2        | 2.0  | 3.E-17 | 1.9      | 8E-08 | 0.7              | 0.008 |

|         |     |        |     |       |     |       |
|---------|-----|--------|-----|-------|-----|-------|
| PRKAA1  | 0.9 | 5.E-02 | 0.8 | 2E-03 | 0.7 | 0.008 |
| JAK1    | 0.8 | 3.E-14 | 0.8 | 4E-07 | 0.7 | 0.004 |
| PNKP    | 1.4 | 3.E-10 | 1.8 | 2E-05 | 0.7 | 0.012 |
| PRKAG2  | 0.8 | 3.E-05 | 0.7 | 4E-05 | 0.6 | 0.008 |
| PIP5K3  | 0.9 | 3.E-03 | 0.7 | 2E-07 | 0.6 | 0.034 |
| RFK     | 1.3 | 3.E-04 | 1.2 | 4E-03 | 0.6 | 0.001 |
| PRKCB1  | 0.7 | 5.E-10 | 0.7 | 3E-04 | 0.6 | 0.003 |
| PIP4K2B | 0.8 | 5.E-11 | 0.7 | 9E-09 | 0.6 | 0.024 |
| NEK9    | 0.7 | 3.E-12 | 0.7 | 3E-09 | 0.6 | 0.000 |
| ILK     | 0.9 | 9.E-03 | 0.8 | 2E-04 | 0.6 | 0.017 |
| ETNK1   | 1.0 | 4.E-01 | 0.7 | 5E-07 | 0.6 | 0.010 |
| ITPKB   | 0.7 | 4.E-12 | 0.6 | 2E-07 | 0.6 | 0.030 |
| MOBK2C  | 1.2 | 7.E-05 | 1.4 | 2E-03 | 0.5 | 0.027 |
| ROCK2   | 0.7 | 4.E-08 | 0.8 | 3E-04 | 0.5 | 0.004 |
| TTBK2   | 0.8 | 8.E-06 | 0.6 | 2E-06 | 0.5 | 0.000 |
| AXL     | 0.7 | 7.E-10 | 0.7 | 2E-03 | 0.5 | 0.000 |
| MAP2K6  | 1.4 | 3.E-05 | 1.8 | 2E-04 | 0.5 | 0.028 |
| MOBK2B  | 1.3 | 5.E-08 | 1.4 | 5E-03 | 0.5 | 0.022 |
| PRKAB2  | 0.6 | 1.E-12 | 0.6 | 9E-08 | 0.5 | 0.007 |
| PHKB    | 0.8 | 2.E-06 | 0.7 | 2E-04 | 0.5 | 0.035 |
| PIK3R1  | 0.6 | 6.E-10 | 0.4 | 1E-07 | 0.4 | 0.012 |
| MAPK9   | 1.2 | 1.E-02 | 1.2 | 6E-04 | 0.4 | 0.001 |
| PCK2    | 1.5 | 4.E-08 | 1.5 | 8E-05 | 0.4 | 0.013 |
| PIK3CD  | 1.4 | 2.E-07 | 2.2 | 8E-07 | 0.4 | 0.002 |
| SNF1LK2 | 0.6 | 2.E-12 | 0.6 | 9E-05 | 0.4 | 0.035 |
| GKAP1   | 0.7 | 3.E-08 | 0.7 | 2E-05 | 0.4 | 0.004 |
| ULK2    | 0.8 | 2.E-06 | 0.8 | 3E-05 | 0.4 | 0.001 |
| PRKAR2B | 0.8 | 7.E-04 | 0.7 | 3E-03 | 0.4 | 0.039 |
| NTRK2   | 0.7 | 5.E-04 | 0.5 | 2E-04 | 0.4 | 0.003 |
| MERTK   | 0.7 | 8.E-09 | 0.6 | 1E-03 | 0.4 | 0.009 |
| PFTK1   | 0.7 | 2.E-07 | 0.7 | 1E-04 | 0.4 | 0.004 |
| ADRBK2  | 0.7 | 4.E-06 | 0.7 | 6E-04 | 0.3 | 0.038 |
| DAPK1   | 0.9 | 3.E-02 | 0.8 | 3E-03 | 0.3 | 0.013 |
| SYK     | 1.7 | 6.E-15 | 2.2 | 3E-10 | 0.3 | 0.021 |
| PRKAA2  | 0.6 | 3.E-07 | 0.6 | 1E-03 | 0.2 | 0.019 |
| AKAP12  | 0.7 | 1.E-06 | 0.6 | 3E-03 | 0.2 | 0.025 |
| PKIA    | 1.6 | 1.E-04 | 2.5 | 2E-04 | 0.2 | 0.013 |
| AK1     | 1.5 | 8.E-12 | 1.6 | 4E-05 | 0.1 | 0.009 |
| PHKA1   | 1.4 | 3.E-11 | 1.3 | 3E-05 | 0.1 | 0.008 |
| CDKN1C  | 0.8 | 4.E-05 | 0.7 | 3E-03 | 0.1 | 0.018 |
